# Supplementary material for: Fibroblast growth factor receptor 2 expression, but not its genetic amplification, is associated with tumor growth and worse survival in esophagogastric junction adenocarcinoma
Source: PubMed Central journal article supplement (PMC4991416; doi:10.18632/oncotarget.7782), 2016-02-27
Supplement: oncotarget-07-19748-s001.pdf [file oncotarget-07-19748-s001.pdf]

## Fibroblast growth factor receptor 2 expression, but not its genetic amplification, is associated with tumor growth and worse survival in esophagogastric junction adenocarcinoma

### Supplementary Materials

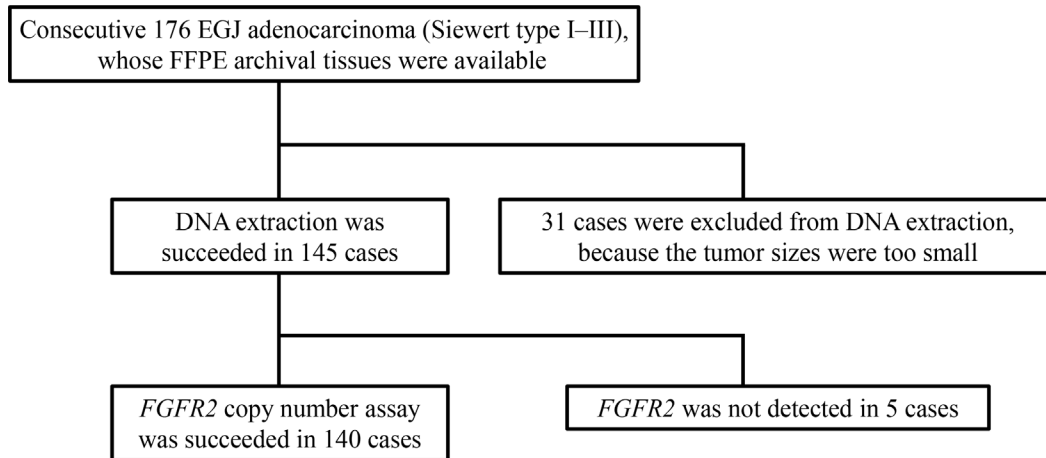

Supplementary Figure S1: Flow chart showing the inclusion/exclusion criteria for copy number assay and immunohistochemical staining.

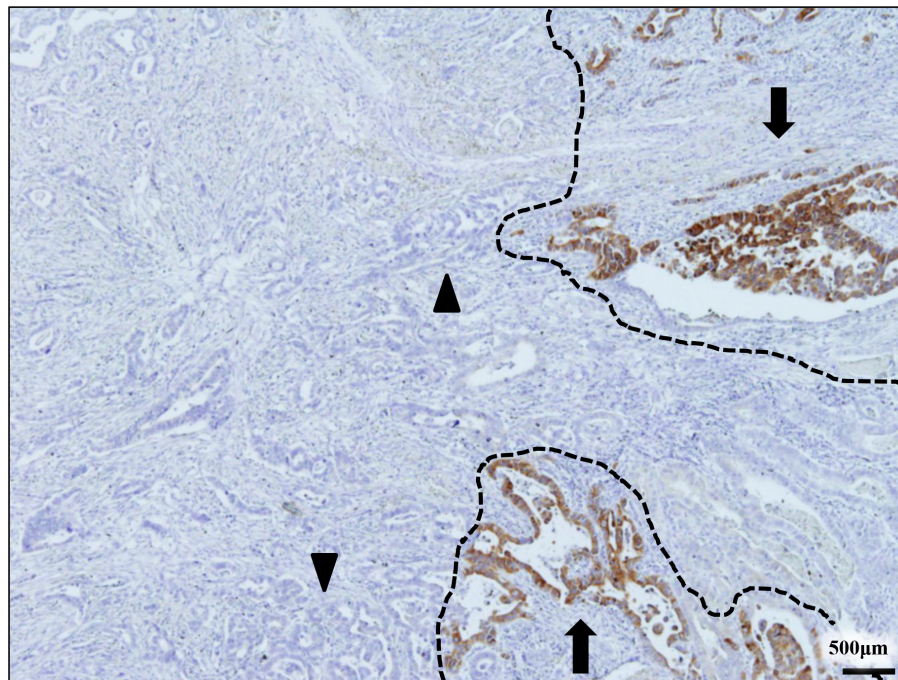

Supplementary Figure S2: Heterogeneous *FGFR2* expression in EGJ adenocarcinoma. The tumor cells area surrounded by dotted lines are negative for *FGFR2* expression. The arrows show *FGFR2* positive cancer cells. The arrowheads show *FGFR2* negative cancer cells.

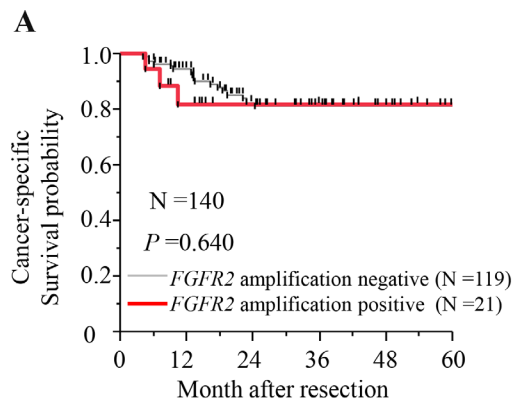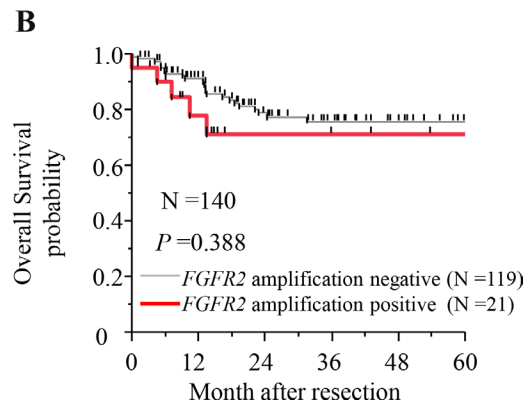

**Supplementary Figure S3: Patient outcomes in cases of positive (red) and negative (gray) *FGFR2* amplification (N = 140).** (A) cancer-specific survival; (B) overall survival.

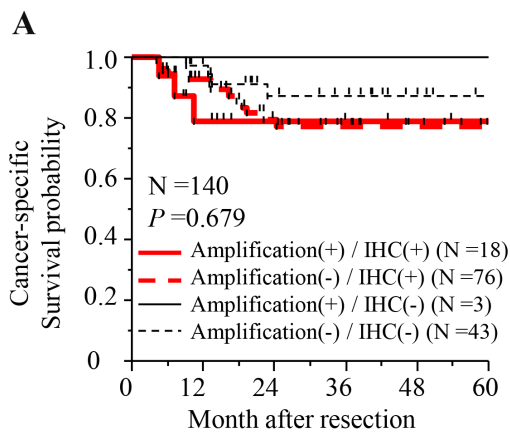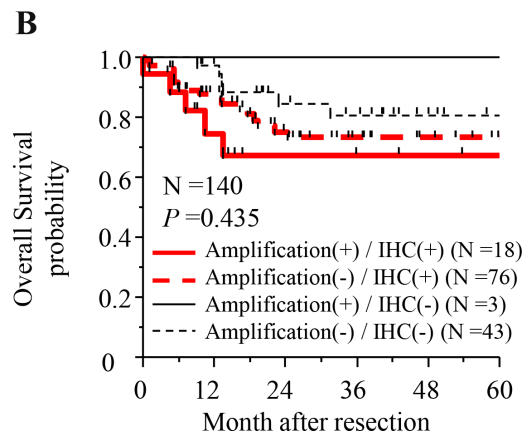

**Supplementary Figure S4: Patient outcomes according to combinations of *FGFR2* amplification and *FGFR2* IHC status (N = 140).** (A) cancer-specific survival; (B) overall survival.

**Supplementary Table S1: Primer sequences used in qRT-PCR of mRNA**

| Gene          | Primer sequence                 |
|---------------|---------------------------------|
| <i>FGFR2</i>  | F 5'-GGACCCAAAATGGGAGTTTC-3'    |
|               | R 5'-ACCACTTGCCCAAAGCAA-3'      |
| <i>HPRT-1</i> | F 5'-TGACCTTGATTATTTTGCATACC-3' |
|               | R 5'-CGAGCAAGACGTTTCAGTCCT-3'   |

**Supplementary Table S2: Univariate and multivariate logistic analysis of *FGFR2* amplification status in EGJ adenocarcinoma patients with tumor resection**

| Factors                | <i>FGFR2</i><br>amplification<br>positive status (%) | Univariate analysis |        |                | Multivariate analysis |        |                |       |
|------------------------|------------------------------------------------------|---------------------|--------|----------------|-----------------------|--------|----------------|-------|
|                        |                                                      | OR                  | 95% CI | <i>P</i> value | OR                    | 95% CI | <i>P</i> value |       |
| Age                    | ≥ 70/< 70                                            | 9 (14%)/12 (16%)    | 0.82   | 0.31–2.07      | 0.669                 | 0.71   | 0.25–1.95      | 0.511 |
| Sex                    | Male/female                                          | 17 (15%)/4 (15%)    | 1.02   | 0.34–3.79      | 0.976                 | 1.21   | 0.31–3.93      | 0.760 |
| Siewert classification | I–II/III                                             | 13 (15%)/8 (15%)    | 1.01   | 0.37–2.59      | 0.981                 | 1.02   | 0.38–2.85      | 0.971 |
| Tumor depth            | T2–T4/T1                                             | 15 (15%)/6 (14%)    | 1.13   | 0.42–3.37      | 0.816                 | 1.08   | 0.31–3.94      | 0.903 |
| Lymph node metastasis  | Positive/negative                                    | 12 (18%)/9 (12%)    | 1.66   | 0.65–4.35      | 0.286                 | 1.90   | 0.63–6.13      | 0.256 |
| Distant metastasis     | Positive/negative                                    | 2 (15%)/19 (15%)    | 1.03   | 0.15–4.26      | 0.968                 | 1.04   | 0.22–7.58      | 0.961 |
| Histopathological type | Poorly/well-moderate                                 | 4 (9%)/17 (18%)     | 0.48   | 0.13–1.41      | 0.192                 | 0.38   | 0.10–1.21      | 0.104 |

In multiple-hypothesis testing, the significant *P*-value was adjusted to  $P = 0.05/14 = 0.004$ . Thus, a *P* value between 0.05 and 0.004 should be regarded as borderline significant.

*CI*, confidence interval; *EGJ*, esophagogastric junction; *FGFR2*, fibroblast growth factor receptor 2; *OR*, odds ratio  $N = 176$ .
